# Supplementary material
Source: PubMed Central journal article supplement (PMC7196664)
Supplement: supp_RA120.013114_158942_2_supp_497759_q7p8b6.pdf [file supp_RA120.013114_158942_2_supp_497759_q7p8b6.pdf]

## Supporting Information

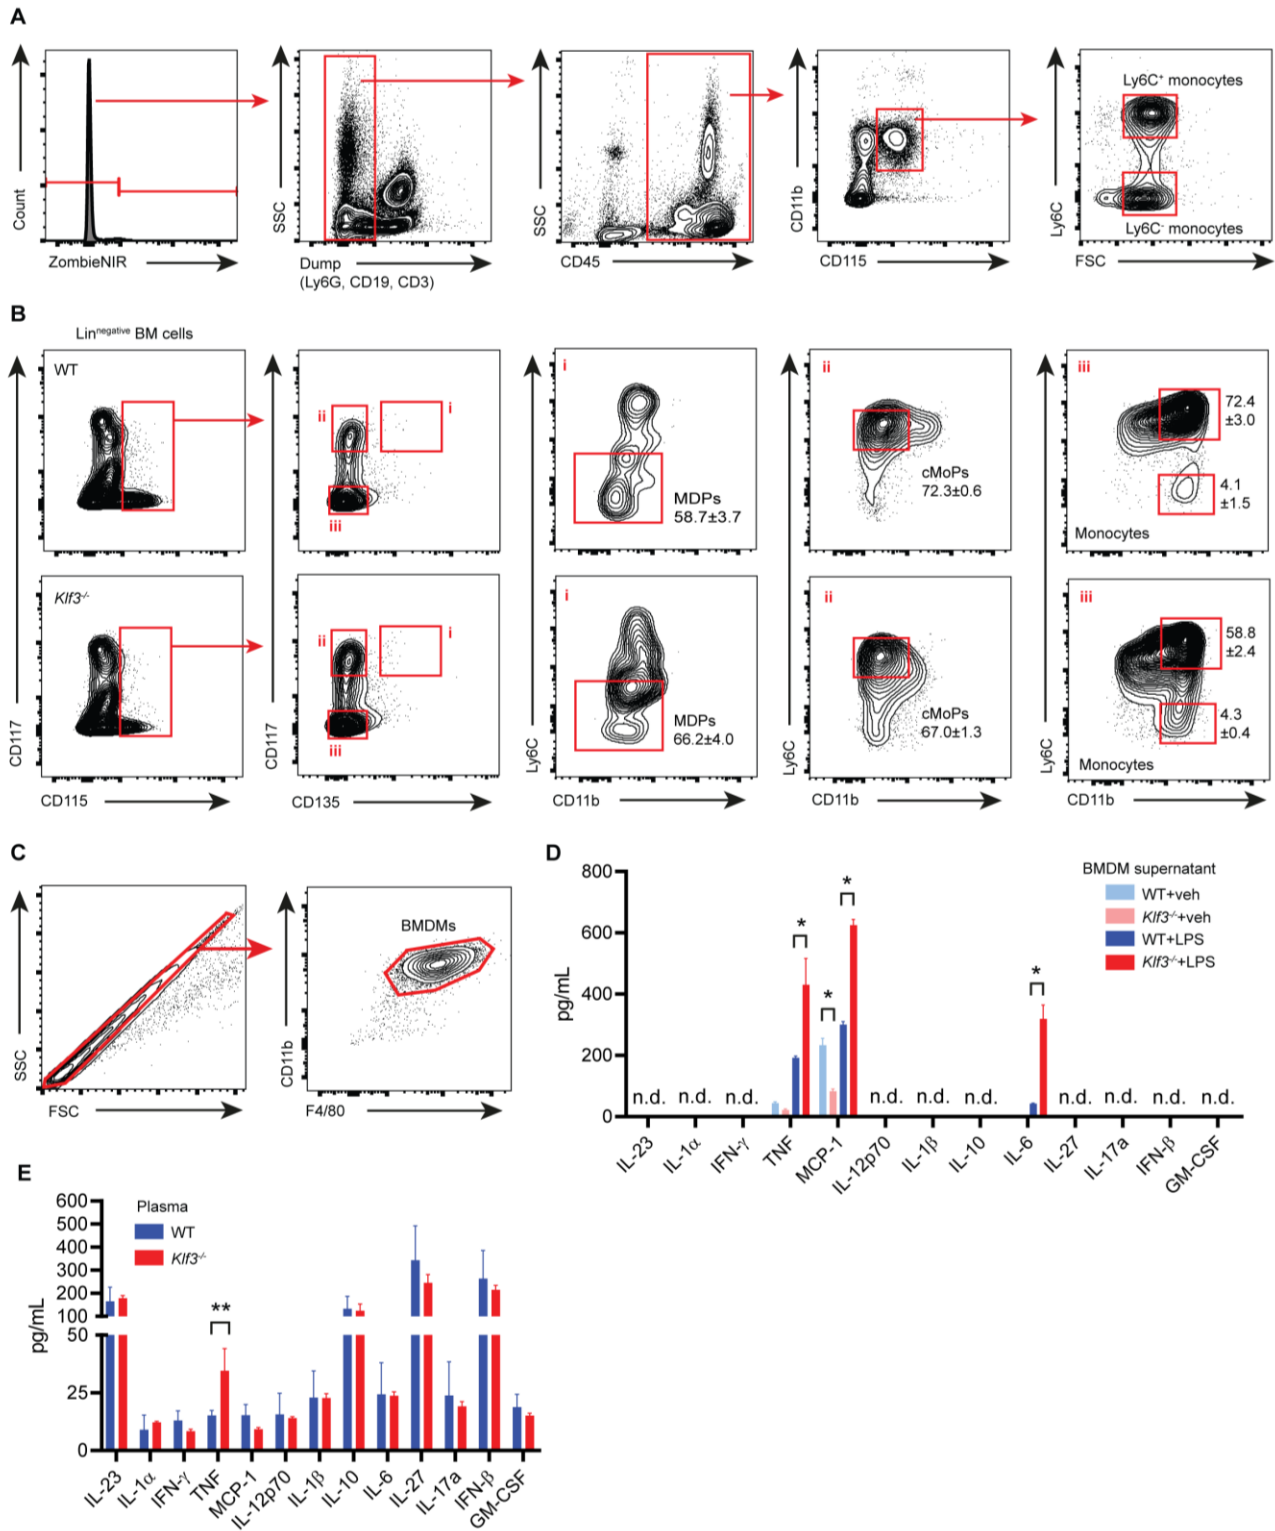

**Figure S1. Related to Figure 1. Pronounced systemic inflammation in the absence of KLF3.** (A) Gating strategy for identifying CD115<sup>+</sup> Ly6C<sup>+/-</sup> monocytes, defined as live (ZombieNIR<sup>-</sup>) Ly6G<sup>-</sup> CD3<sup>-</sup> CD19<sup>-</sup> CD45<sup>+</sup> CD11b<sup>+</sup>

CD115<sup>+</sup> Ly6C<sup>+/-</sup>. (B) Quantification of monocyte precursor populations in the bone marrow of WT and *Klf3*<sup>-/-</sup> mice (n=4). Lineage exclusion was performed (Ter119<sup>-</sup> CD19<sup>-</sup> CD3<sup>-</sup> NK1.1<sup>-</sup> Ly6G<sup>-</sup> TCRδ<sup>-</sup>) on live single cells, upon which monocyte precursors were defined as CD117<sup>+/-</sup> and CD115<sup>+</sup>. This population was divided into three subsets based on expression of CD117 and CD135: (i) CD117<sup>+</sup> CD135<sup>+</sup> Ly6C<sup>-</sup> CD11b<sup>-</sup> macrophage-dendritic cell progenitors (MDPs), (ii) CD117<sup>+</sup> CD135<sup>-</sup> Ly6C<sup>+</sup> CD11b<sup>-</sup> common monocyte progenitors (cMoPs) and (iii) CD117<sup>-</sup> CD135<sup>-</sup> CD11b<sup>+</sup> Ly6C<sup>+/-</sup> monocytes. Plots are representative of four biological replicates and means±SEM are given as a percentage of parent population. (C) Gating strategy to confirm purity of CD11b<sup>+</sup> F4/80<sup>+</sup> BMDMs by flow cytometry. LEGENDplex kits were used to quantify inflammatory cytokines in (D) supernatants from WT and *Klf3*<sup>-/-</sup> BMDMs treated with vehicle (veh) or 100 ng/mL LPS for 24 h (n=3 per genotype/treatment group) and in (E) WT (n=5) and *Klf3*<sup>-/-</sup> (n=7) plasma. Error bars are representative of means±SEM. Non-parametric Mann-Whitney U tests were performed to assess significance between genotypes within the same condition for each cytokine tested, where \**P*<0.05 and \*\**P*<0.01. n.d: not detected.

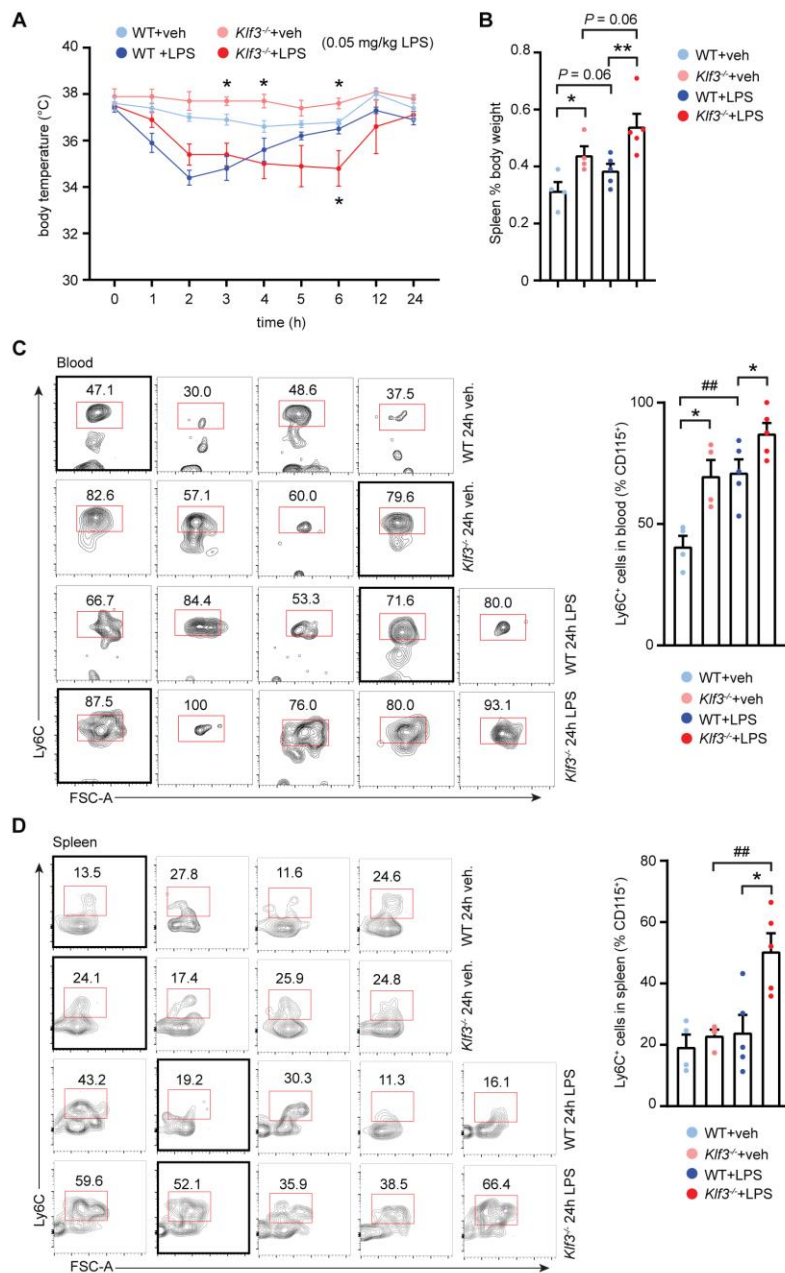

**Figure S2. Related to Figure 2. Mice lacking KLF3 show a heightened and prolonged inflammatory response to endotoxin treatment.** (A) WT and *Klf3*<sup>-/-</sup> mice were intraperitoneally administered with vehicle (veh) or 0.05 mg/kg LPS and their body temperature was measured by rectal probing over 24 h, with error bars representative of SEM (veh: n=3 per genotype and LPS: n=6 per genotype). (B) Spleens were harvested from mice treated with 0.167 mg/kg LPS, then weighed. Error bars represent the means±SEM (veh: n=4 per genotype and LPS: n=5 per genotype). Ly6C<sup>+</sup> monocyte abundance in the (C) blood and (D) spleen of WT and *Klf3*<sup>-/-</sup> mice given 0.167 mg/kg LPS or vehicle was measured by flow cytometry and all final gating plots shown. Abundances are shown as a percentage of the parent population, CD115<sup>+</sup> monocytes, and accompanying column graphs are shown with error bars representing the means±SEM. Representative median plots, outlined in bold, were used in Figure 2G-H. For (A-D), non-parametric Mann-Whitney U tests were performed to assess statistical significance where \**P*<0.05,

\*\* $P < 0.01$  between genotypes and ## $P < 0.01$  between conditions within the same genotype. FSC-A: forward scatter (area)

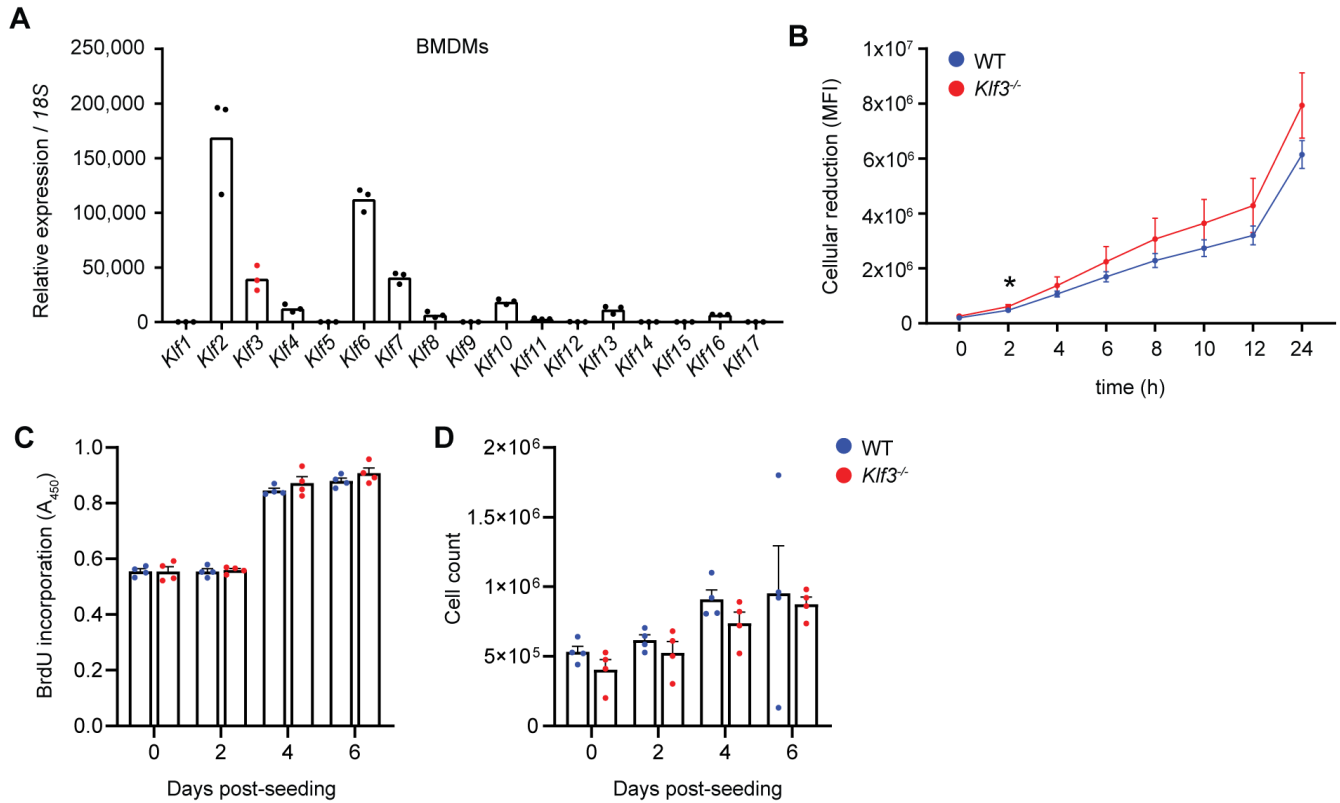

**Figure S3. Related to Figure 3. Macrophages lacking KLF3 exhibit enhanced inflammatory function.** (A) mRNA expression of all *Klf* family member genes was assessed in BMDMs using qPCR to determine the relative expression of *Klf3*, with values normalised to expression of *18S* rRNA levels. (B) AlamarBlue assays were conducted to assess the cellular reduction environment by measuring conversion of resazurin blue substrate in BMDMs over a 24 h period (n=8). (C) WT and *Klf3*<sup>-/-</sup> BMDMs were seeded then BrdU incorporation assays performed at days 0, 2, 4 and 6. Absorbance readout was obtained at 450 nm to quantify BrdU incorporation of actively replicating cells (n=4). (D) BMDM growth rate was assessed by monitoring cell counts 0, 2, 4 and 6 days post-seeding (n=4). For (B-D), error bars are representative of means $\pm$ SEM of biological replicates, and non-parametric Mann-Whitney U tests were carried out where \* $P$ <0.05.

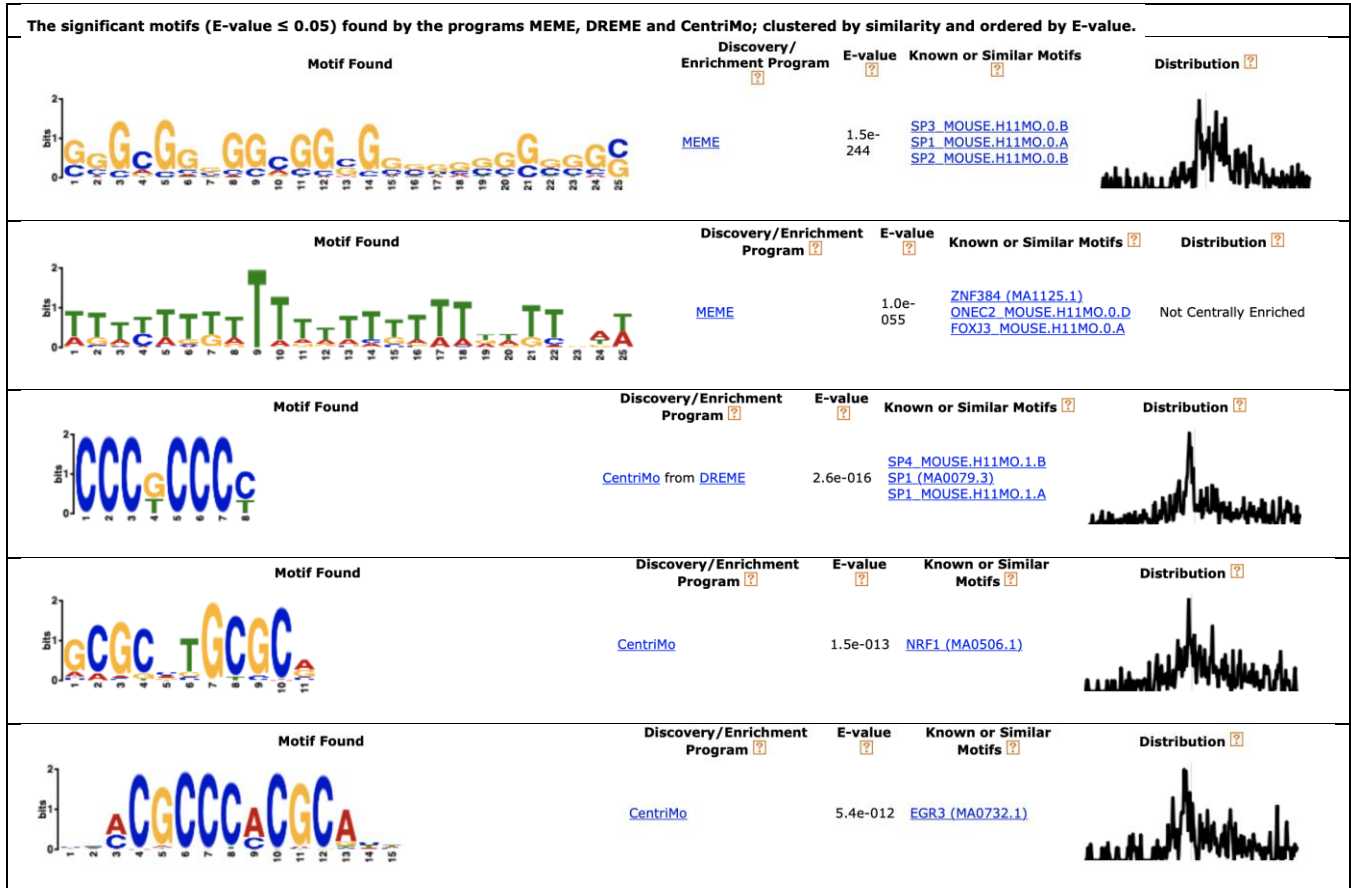

**Figure S4.** Related to Figure 4. The promoter regions of differentially expressed genes between WT and *Klf3*<sup>-/-</sup> BMDMs treated with LPS for 8 h are enriched for Sp/KLF family binding sites. *De novo* motif discovery and known motif enrichment analysis using MEME-ChIP on differentially expressed genes from microarray analysis comparing WT and *Klf3*<sup>-/-</sup> BMDMs treated with LPS for 8 h. The top 5 most highly enriched motifs and the transcription factors that are known to bind to these or similar motifs from the MEME-ChIP analysis are shown. The first and third most highly enriched motifs match known motifs for the Sp/KLF transcription factor family, which includes KLF3.

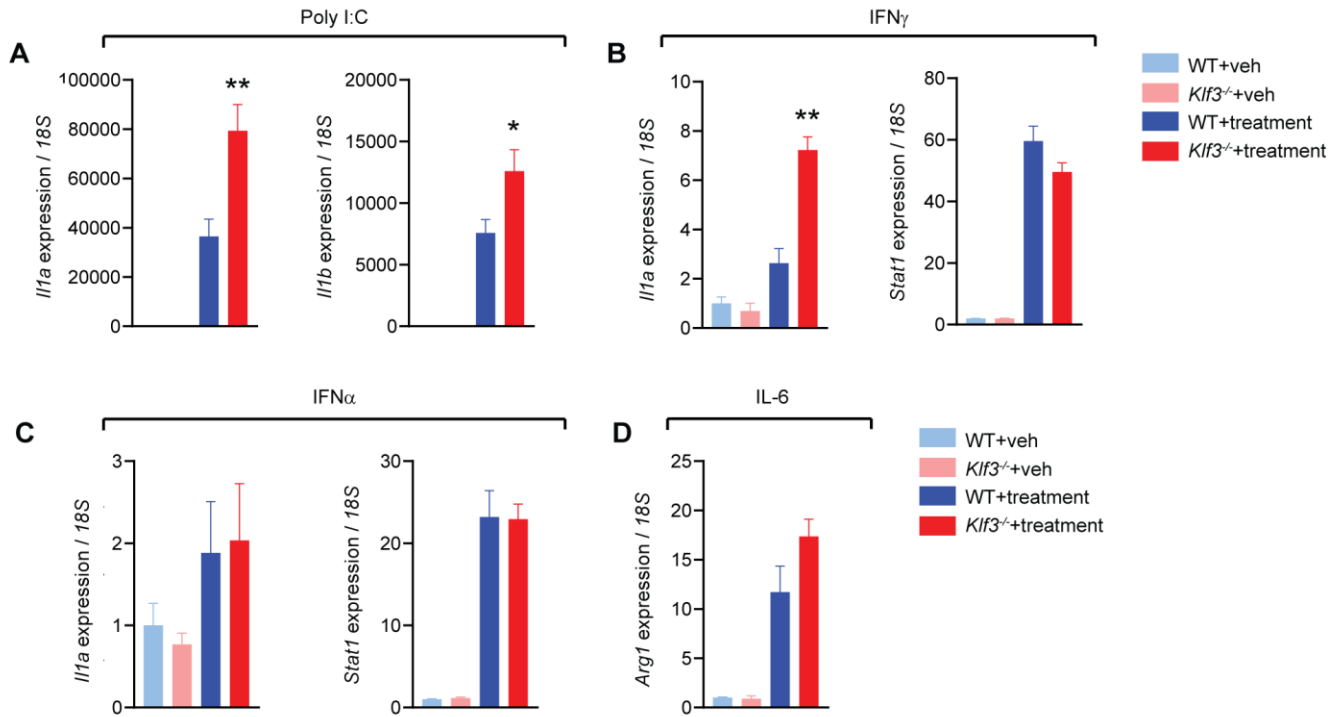

**Figure S5. Related to Figure 4. Stimulation of macrophages with ligands which trigger NF- $\kappa$ B-dependent or -independent inflammatory pathways suggests that the effect of KLF3 deficiency on gene expression is specific to the NF- $\kappa$ B pathway.** WT and *Klf3*<sup>-/-</sup> BMDMs were treated for 8 h with vehicle or 10  $\mu$ g/mL poly I:C (A), 10 ng/mL IFN $\gamma$  (B), 10 ng/mL IFN $\alpha$  (C) and 10 ng/mL IL-6 (D). Gene expression was normalised to 18S rRNA levels and the WT vehicle set to 1. Error bars are representative of the means $\pm$ SEM of four biological replicates for each experiment. Non-parametric Mann Whitney U tests were carried out where \* $P$ <0.05 and \*\* $P$ <0.01.

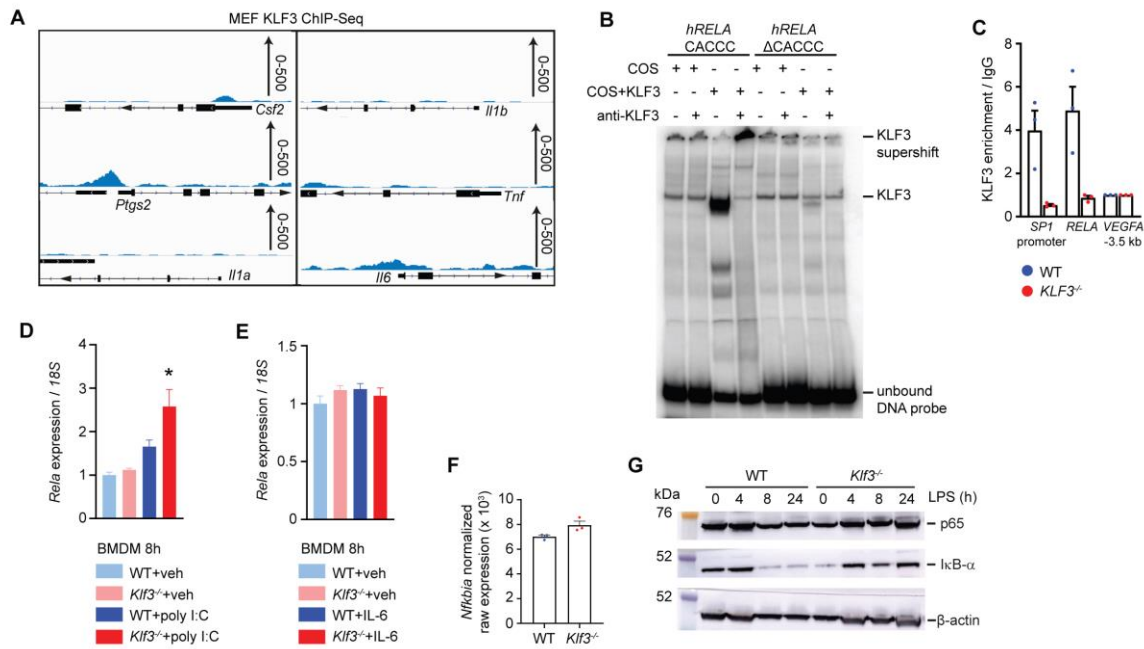

**Figure S6. Related to Figure 5. KLF3 suppresses activation of NF- $\kappa$ B genes.** (A) KLF3-V5 ChIP-Seq in murine embryonic fibroblasts showing KLF3 enrichment at promoter regions cytokine genes deregulated in *Klf3*<sup>-/-</sup> BMDMs (Accession No. GSE44748) (35). (B) EMSA was used to detect KLF3 binding to a radiolabelled DNA probe comprised of the wild type (CACCCC) or mutated ( $\Delta$ CACCCC) human *RELA* promoter consensus sequence. Nuclear extracts from COS-7 cells over-expressing pMT3-Klf3 and untransfected COS-7 cells were used as positive and negative controls respectively. Polyclonal anti-KLF3 antibody ( $\alpha$ -KLF3) raised in rabbit was added to confirm the identity of bound protein as KLF3, labelled as a supershift band. Unbound radiolabelled DNA probe can be seen as an intense dark band at the bottom of the gel. (C) *In vivo* KLF3 binding at the human *RELA* promoter in WT and *KLF3*<sup>-/-</sup> K562 cells was performed using ChIP-qPCR (n=3 individual clonal populations per genotype). The *SPI1* promoter serves as a positive control region, where KLF3 is known to bind, and *VEGFA* is a negative control locus. Error bars represent means $\pm$ SEM. WT and *Klf3*<sup>-/-</sup> BMDMs were treated for 8 h with vehicle (veh), 10  $\mu$ g/mL poly I:C (D) or 10 ng/mL IL-6 (E) and expression of *Rela* normalized to *18S* levels. The WT veh treatment was set to 1. For (D-E), error bars represent means $\pm$ SEM and non-parametric Mann-Whitney U tests were used to assess significance between genotypes under each condition where \* $P$ <0.05. (F) Normalized raw expression of *Nfkb1a* from microarrays in WT and *Klf3*<sup>-/-</sup> BMDMs treated with 100 ng/mL LPS for 8 h (n=3). Error bars represent the means $\pm$ SEM. (G) Total cellular levels of the NF- $\kappa$ B p65 subunit (RELA) and I $\kappa$ B- $\alpha$  were measured in WT and *Klf3*<sup>-/-</sup> BMDMs following stimulation with 100 ng/mL LPS for 0-24 h. 20  $\mu$ g of whole cell extract was loaded per lane alongside a Rainbow Molecular Weight Marker (GE Healthcare). Membranes were probed with a monoclonal anti-p65 antibody (raised in rabbit, 65 kDa), monoclonal anti-I $\kappa$ B- $\alpha$  (raised in rabbit; ab32518) and anti- $\beta$ -actin antibody (raised in mouse; A1978).



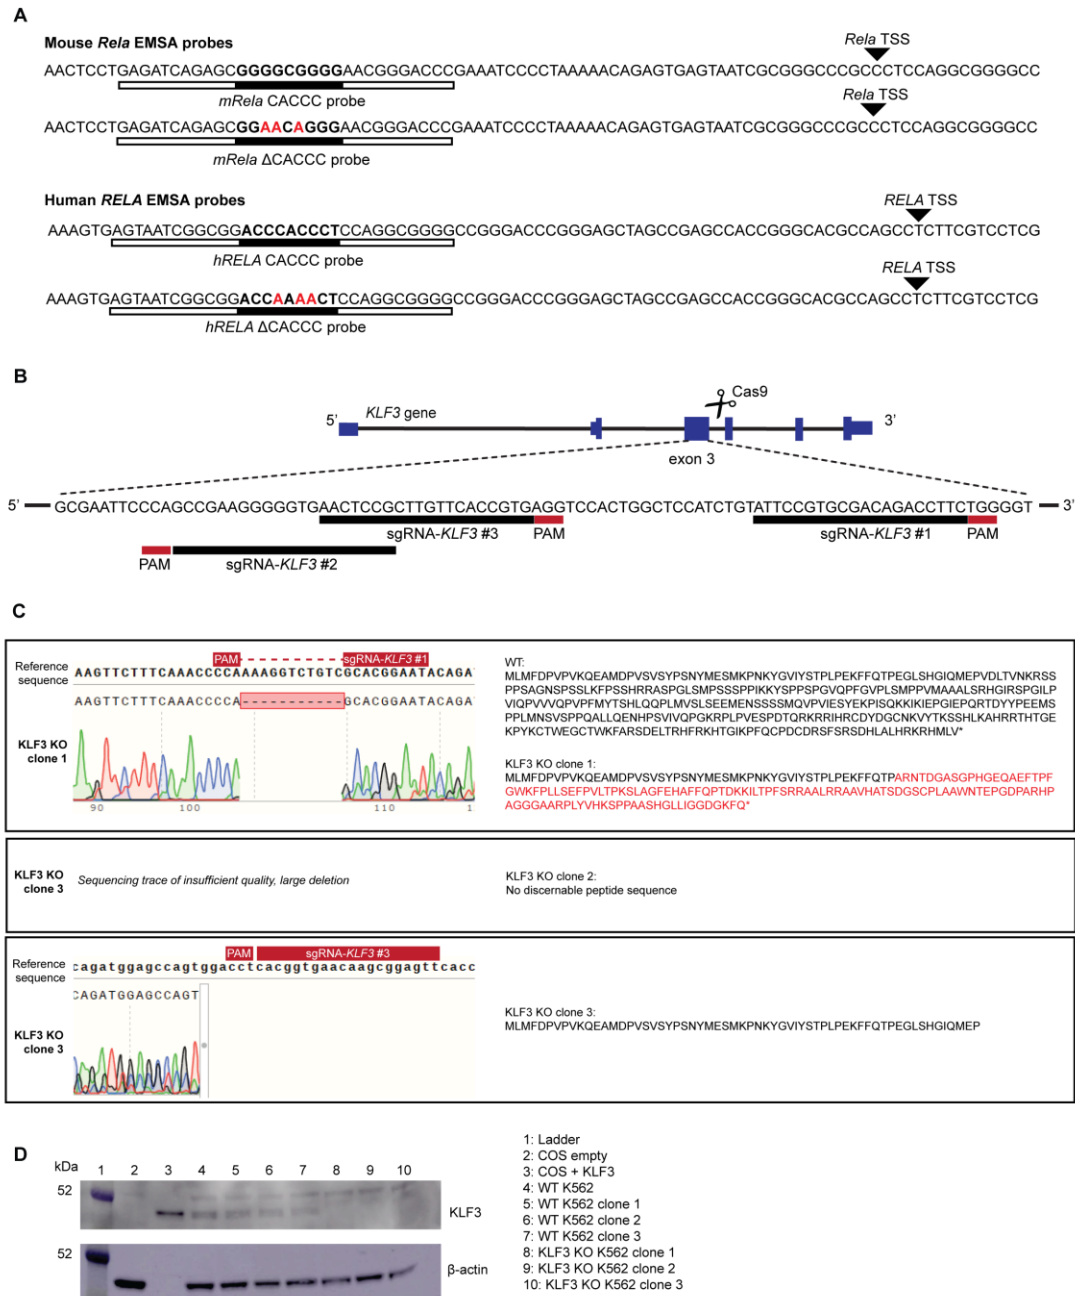

**Figure S7. Related to Figure 5. KLF3 suppresses activation of NF- $\kappa$ B genes.** (A) EMSA probes designed to encompass the KLF3 binding site (CACCC box; bold) in the mouse and human *Rela/RELA* promoters, and mutated probes (mutated base pairs in red) to show loss of KLF3 binding. (B) The CRISPR/Cas9 *KLF3* knockout strategy, utilising three separate guide RNAs (sgRNA) to recruit Cas9 to cut at exon 3. (C) Sanger sequencing traces for *KLF3*<sup>-/-</sup> K562 clones compared to reference sequence, showing disruptions to the *KLF3* gene and peptide sequence. (D) Western blot showing the presence or absence of KLF3 (~48 kDa) in WT (lanes 5-7) and *KLF3*<sup>-/-</sup> (lanes 8-10) K562 nuclear extracts. Extracts from untransfected COS-7 cells (lane 2), COS-7 cells over-expressing pMT3-Klf3 (lane 3) and WT K562 cells (lane 4) were used as control lanes, and for testing the specificity of the polyclonal anti-KLF3 antibody (Thermo Fisher). Nitrocellulose membranes were probed for  $\beta$ -actin using an anti- $\beta$ -actin antibody (Sigma), and size determined with reference to a Rainbow Molecular Weight Marker (GE Healthcare; lane 1). TSS: transcription start site. PAM: proto-spacer adjacent motif. kDa: kilodaltons. COS: COS-7 cells.

**Table S1. Mammalian expression plasmids**

| Plasmid name               | Source                             | Application                                |
|----------------------------|------------------------------------|--------------------------------------------|
| pSpCas9(BB)-2A-GFP (PX458) | Feng Zhang (Addgene plasmid 48138) | CRISPR/Cas9 genome editing                 |
| pMT3- <i>Klf3</i>          | Jose Perdomo, University of Sydney | <i>Klf3</i> over-expression in COS-7 cells |

**Table S2. Oligonucleotides for CRISPR/Cas9 genome editing**

| Oligo name                          | Sequence                   |
|-------------------------------------|----------------------------|
| <i>hKLF3</i> ex3 sgRNA#1 Fwd        | CACCGATTCCGTGCGACAGACCTTC  |
| <i>hKLF3</i> ex3 sgRNA#1 Rev        | AAACGAAGGTCTGTTCGCACGGAATC |
| <i>hKLF3</i> ex3 sgRNA#2 Fwd        | CACCGAACTCCGCTTGTTACCCGTG  |
| <i>hKLF3</i> ex3 sgRNA#2 Rev        | AAACCACGGTGAACAAGCGGAGTTC  |
| <i>hKLF3</i> ex3 sgRNA#3 Fwd        | CACCGCGGAGTTCACCCCCTTCGGC  |
| <i>hKLF3</i> ex3 sgRNA#3 Rev        | AAACGCCGAAGGGGGTGAAGTCCGC  |
| <i>hKLF3</i> ex3 PCR Fwd/Sequencing | CTTATTTGGCTGTTGACACG       |
| <i>hKLF3</i> ex3 PCR Rev            | GGCAGATGAGTATTCCTTTG       |

**Table S3. EMSA probes**

| Probe name                    | Sequence                        |
|-------------------------------|---------------------------------|
| CACCC sense                   | TAGAGCCACACCCTGGTAAG            |
| CACCC antisense               | CTTACCAGGGTGTGGCTCTA            |
| <i>mRela</i> CACCC sense      | GAGATCAGAGCGGGGCGGGGAACGGGACCC  |
| <i>mRela</i> CACCC antisense  | GGGTCCCCTTCCCCGCCCGCTCTGATCTC   |
| <i>mRela</i> ΔCACCC sense     | GAGATCAGAGCGGAACAGGGGAACGGGACCC |
| <i>mRela</i> ΔCACCC antisense | GGGTCCCCTTCCCTGTTCCGCTCTGATCTC  |
| <i>hRELA</i> CACCC sense      | AGTAATCGGCGGACCCACCCTCCAGGCGGGG |
| <i>hRELA</i> CACCC antisense  | CCCCGCCTGGAGGGTGGGTCCGCCGATTACT |
| <i>hRELA</i> ΔCACCC sense     | AGTAATCGGCGGACCAAACTCCAGGCGGGG  |
| <i>hRELA</i> ΔCACCC antisense | CCCCGCCTGGAGTTTTGGTCCGCCGATTACT |

**Table S4. Quantitative real-time PCR primers**

| <b>Oligo name</b>         | <b>Sequence</b>             |
|---------------------------|-----------------------------|
| <i>18S</i> rRNA Fwd       | CACGGCCGGTACAGTGAAAC        |
| <i>18S</i> rRNA Rev       | AGAGGAGCGAGCGACCAA          |
| <i>mKlf1</i> Fwd          | AGACTGTCTTACCCTCCATCAGTACA  |
| <i>mKlf1</i> Rev          | CCGCCACCACTTGAGGAA          |
| <i>mKlf2</i> Fwd          | ACCAAGAGCTCGCACCTAAA        |
| <i>mKlf2</i> Rev          | TCCTTCCCAGTTGCAATGAT        |
| <i>mKlf3</i> exon 4/5 Fwd | GAAATGTCACCCCCTTTAATGAAC    |
| <i>mKlf3</i> exon 4/5 Rev | CACGATGACGGAAGGATGGT        |
| <i>mKlf3</i> exon 1b Fwd  | AGAAATAATTGATGAGAGGCACAGATT |
| <i>mKlf3</i> exon 1b Rev  | ATGTCTGGCCTCACTCTTCCA       |
| <i>mKlf4</i> Fwd          | GTGGCAAACCTATACCAAGAGTTC    |
| <i>mKlf4</i> Rev          | GGTAGTGCCTGGTCAGTTCATC      |
| <i>mKlf5</i> Fwd          | CCGGAGACGATCTGAAACAC        |
| <i>mKlf5</i> Rev          | GGAGCTGAGGGGTCAGATACTT      |
| <i>mKlf6</i> Fwd          | CACATCAGCGCACTCACACA        |
| <i>mKlf6</i> Rev          | CAAAACGCCACTCACAACCTT       |
| <i>mKlf7</i> Fwd          | TCCCCTTAAAGGCCACC           |
| <i>mKlf7</i> Rev          | TGTGTGTTTCCTGTAGTGCC        |
| <i>mKlf8</i> Fwd          | TGGTTCGATGCAGGTATTCA        |
| <i>mKlf8</i> Rev          | GGGGCATGTTGAAATCACTC        |
| <i>mKlf9</i> Fwd          | ATACAGGTGAACGGCCCTTT        |
| <i>mKlf9</i> Rev          | TCACTCCTCATGAAGCGCTT        |
| <i>mKlf10</i> Fwd         | GCAGCCAACCATGCTCAAC         |
| <i>mKlf10</i> Rev         | CCCCTCTCTGGGCTTTTCAG        |
| <i>mKlf11</i> Fwd         | ACTCTGTGTATAACTCCTCCTCA     |
| <i>mKlf11</i> Rev         | CAGTGACCATGCATCCTTTG        |
| <i>mKlf12</i> Fwd         | CGCCCTTGAGAACAGAATGC        |
| <i>mKlf12</i> Rev         | GGGTAGTTGTGGACGTTTGGA       |

|                                     |                            |
|-------------------------------------|----------------------------|
| <i>mKlf13</i> Fwd                   | CGAGAAAGTTTACGGGAAATCTTC   |
| <i>mKlf13</i> Rev                   | CAGGCGAAAGGCCTCTCA         |
| <i>mKlf14</i> Fwd                   | TCCATGGACCGGTTCCAT         |
| <i>mKlf14</i> Rev                   | AGAGCCACAGACAGCGGTTAG      |
| <i>mKlf15</i> Fwd                   | TACACCAAGAGCAGCCACCT       |
| <i>mKlf15</i> Rev                   | AACTCATCTGAGCGGGAAAA       |
| <i>mKlf16</i> Fwd                   | TCACACCTGCGGACTCACA        |
| <i>mKlf16</i> Rev                   | CAGAACGGGCGAACTTCTTG       |
| <i>mKlf17</i> Fwd                   | GCAGGACAATAAGGAACAGGC      |
| <i>mKlf17</i> Rev                   | AAGTATTGAGTGGCTGGTGG       |
| <i>mTnf</i> Fwd                     | GCCACCACGCTCTTCTGTCT       |
| <i>mTnf</i> Rev                     | GCCATAGAACTGATGA           |
| <i>mI16</i> Fwd                     | AAAGCCAGAGTCCTTCAGAGAGATAC |
| <i>mI16</i> Rev                     | CTGTTAGGAGAGCATTGGAAATTG   |
| <i>mCsf2</i> Fwd                    | TTGGAAGCATGTAGAGGCCA       |
| <i>mCsf2</i> Rev                    | CGGGTCTGCACACATGTTAG       |
| <i>mI1a</i> Fwd                     | ACAGTTCTGCCATTGACCATC      |
| <i>mI1a</i> Rev                     | CCTTGAAGGTGAAGTTGGACA      |
| <i>mI1b</i> Fwd                     | TGTAATGAAAGACGGCACACC      |
| <i>mI1b</i> Rev                     | TCTTCTTTGGGTATTGCTTGG      |
| <i>mPtgs2</i> Fwd                   | GAACAACATCCCCTTCCTGC       |
| <i>mPtgs2</i> Rev                   | AGAGGTTGGAGAAGGCTTCC       |
| <i>mRela</i> Fwd                    | GCGAATCCAGACCAACAATAAC     |
| <i>mRela</i> Rev                    | CTGTCACCTGGAAGCAGAG        |
| <i>mArg1</i> Fwd                    | CTCCAAGCCAAAGTCCTTAGAG     |
| <i>mArg1</i> Rev                    | AGGAGCTGTTCATTAGGGACATC    |
| <i>mStat1</i> Fwd                   | TCCCGTACAGATGTCCATGA       |
| <i>mStat1</i> Rev                   | ACTTTACTGTCCAGCTCCTTCT     |
| <i>mLgals3</i> positive control Fwd | TGGAAAAACACCCGTGCCTCTGA    |
| <i>mLgals3</i> positive control Rev | CAGTGCCTACGCCAGATGACTC     |

|                                           |                             |
|-------------------------------------------|-----------------------------|
| <i>mRela</i> promoter Fwd                 | TGAGATCAGAGCGGGGCG          |
| <i>mRela</i> promoter Rev                 | GGCCCGACTACAAGCTCC          |
| <i>mKlf8</i> -4.5 kb negative control Fwd | GGTTTCTGAGACCTAACACTTCACACT |
| <i>mKlf8</i> -4.5 kb negative control Rev | CCATTTAGTCATCCAGCGAACAA     |
| <i>hSPI</i> promoter Fwd                  | ACCTCTCCGCCCACTAGGA         |
| <i>hSPI</i> promoter Rev                  | CAACGGCCAACCAGAATCC         |
| <i>hVEGFA</i> -3.5 kb Fwd                 | ACTGGGTCTTGCTGTTTTCC        |
| <i>hVEGFA</i> -3.5 kb Rev                 | TTCAGGCTGTGAACCTTGG         |
| <i>hRELA</i> promoter Fwd                 | TTTAGCTGGAGAGGGACGAG        |
| <i>hRELA</i> promoter Rev                 | CCTGACAGTGCATCAAGAGC        |

**Table S5. Antibodies**

| Antibody name                                              | Raised in | Supplier/Product#                | Application                                            |
|------------------------------------------------------------|-----------|----------------------------------|--------------------------------------------------------|
| Mouse monoclonal $\beta$ -actin clone AC-15                | Mouse     | Sigma A1978                      | Western blotting (1:20,000)                            |
| Mouse/human monoclonal anti-NF- $\kappa$ B/p65 clone C22B4 | Rabbit    | Cell Signalling Technology #4764 | Western blotting (1:1,000)                             |
| Mouse monoclonal anti-I $\kappa$ B $\alpha$ clone E130     | Rabbit    | Abcam ab32518                    | Western blotting (1:500)                               |
| ECL <sup>TM</sup> anti-mouse IgG                           |           | GE Healthcare NA931              | Western blotting (1:10,000-20,000)                     |
| ECL <sup>TM</sup> anti-rabbit IgG                          |           | GE Healthcare NA934              | Western blotting (1:10,000)                            |
| Mouse/human polyclonal anti-KLF3                           | Goat      | Thermo Fisher Pierce PA5-18030   | Western blotting (1:1,000)<br>ChIP (15 $\mu$ g per IP) |
| Normal goat IgG                                            |           | Santa Cruz SC-2028               | ChIP (15 $\mu$ g per IP)                               |
| Mouse polyclonal anti-KLF3                                 | Rabbit    | Homemade                         | EMSA                                                   |
| Anti-mouse CD16/32 Fc block clone 2.4G2                    | Rat       | BD Pharmingen 553141             | Flow cytometry (1:25)                                  |
| FITC anti-mouse CD11b clone M1/70                          | Rat       | BD Pharmingen 557396             | Flow cytometry (1:100)                                 |
| BUV395 anti-mouse CD115 clone T38-320                      | Rat       | BD Optibuild 743642              | Flow cytometry (1:50)                                  |

|                                                |                     |                           |                           |
|------------------------------------------------|---------------------|---------------------------|---------------------------|
| Biotin anti-mouse CD115 clone AFS98            | Rat                 | eBioscience 13-1152-82    | Flow cytometry (1:20)     |
| BV711 Streptavidin                             |                     | BD Horizon 563262         | Flow cytometry (1:100)    |
| APC anti-mouse CD19 clone 1D3                  | Rat                 | eBioscience 17-0193-80    | Flow cytometry (1:20)     |
| APC anti-mouse CD3 clone 145-2C11              | Rat                 | BD Pharmingen 553066      | Flow cytometry (1:20)     |
| APC anti-mouse Ly6G clone 1A8                  | Rat                 | BD Pharmingen 560599      | Flow cytometry (1:20)     |
| BV421 anti-mouse Ly6C clone AL-21              | Rat                 | BD Horizon 562727         | Flow cytometry (1:33)     |
| PE anti-mouse CD45 clone 30-F11                | Rat                 | BD Pharmingen 553081      | Flow cytometry (1:100)    |
| PE/Cy5 anti-mouse F4/80 clone BM8              | Rat                 | eBioscience 15-4801-80    | Flow cytometry (1:100)    |
| APC anti-mouse CD135 clone A2F10.1             | Rat                 | BD Biosciences<br>560718  | Flow cytometry<br>(1:100) |
| PE anti-mouse CD117 clone 2B8                  | Rat                 | BD Pharmingen<br>561075   | Flow cytometry<br>(1:100) |
| Biotin anti-mouse Ter119 clone Ter-119         | Rat                 | BD Biosciences 553672     | Flow cytometry (1:200)    |
| Biotin anti-mouse CD19 clone 1D3               | Rat                 | BD Pharmingen<br>553784   | Flow cytometry (1:200)    |
| Biotin anti-mouse CD3 clone 145-2C11           | Armenian<br>hamster | eBioscience<br>13-0031-82 | Flow cytometry (1:200)    |
| Biotin anti-mouse NK1.1 clone PK136            | Mouse               | eBioscience<br>13-5941-82 | Flow cytometry (1:200)    |
| Biotin anti-mouse Ly6G clone                   | Rat                 | BD Pharmingen<br>553124   | Flow cytometry (1:200)    |
| Biotin anti-mouse TCR $\gamma\delta$ clone GL3 | Armenian<br>hamster | eBioscience<br>13-5711-82 | Flow cytometry (1:200)    |
| PE-CF594 Streptavidin                          |                     | BD Biosciences 562318     | Flow cytometry (1:300)    |
